# Supplementary material for: Regulation of membrane trafficking and organ separation by the NEVERSHED ARF-GAP protein
Source: Oxford University Press journal article supplement (doi:10.1242/dev.033605), 2009-05-08
Supplement: dev033605-sup-033605-figs3.pdf [file dev033605-sup-033605-figs3.pdf]

NEV MNEKANVSKELNARHRKILEGLLLKHPENRECADCKTKGPRWASVNLGIFICMQCSGIHRS  
OsI\_025582 MNEKASVSKELNAKHKKILEGLLLRLPENRECADCKSKGPRWASVNLGIFICMQCSGIHRS

NEV LGVHISKVRSATLDTWLPEQVAFIQSMGNDKANSYWEAELPPNYDRVGIENFIRAKYEK  
OsI\_025582 LGVHISKVRSATLDTWLPEQVAFIQSMGNEKSNYSYWEAELPPNYDRVGIENFIRAKYEDK

NEV RWVSRGEKARSPPRVEQERRKSVERS GPGYEHGHSSSPVNLFEERKTIPASRTRNNVAAT  
OsI\_025582 RWIPRNGSSRPSSGARDEKSSSESQTSVNRGGHNQRSS----FEQHRTPSPAAVSKIAPVVS

NEV RINLPVPPQGPSQVIKPOQK-MESAATPVEREKQAVNVAPASDPPKVDVFATDLFNMLSMD  
OsI\_025582 RTPTQAPHQPKAQPSVPKVSPPOPEKSPPNATPPKVEKPSVAPPPKVDYATDLFNMLSMD

NEV DSTTNTSEATPGDTPADDNSWAGFQSA GSGQTAEKIVTAKPAESSSPASSSDFEDLFKD  
OsI\_025582 GTTEKEAESSS----NDDSAWEGFQSAEPVPSSDKKDSAKPVESK--POSTSGIEDLFKD

NEV TPNLTTQQAPKD----VKGDIMSLFEKTNIVSPFAMHQQVAMLAQQOALYMAAAKAAGG  
OsI\_025582 SPAVTVSSAPAAPQVNVKNDIMSLFEKSSMVSYPYAVQQOQLAFMTPQQLALLSQQOALLM

NEV TPNGVN--QQA IANALNVASANWSNPGGYQIPGMTNPVGGQADLQKLMQNMNMNANMNR  
OsI\_025582 AALKAGNAPQMIPGNASLLNGNSNPANGGLPSQS----WTNLAYQNPLAPVAAQNGAT

NEV PAQPQENTLQYPSSSFYTMGQANQVNGMTPNSTGKPOSSSATQPTSTTPSSQSGKDFDFS  
OsI\_025582 KVANNNQEFSSFGNFNESPFCAYNTSSSVPANGAASAAANKSTSPSTSSLPSSQSGKEYDFS

NEV SLMDGMFTKH  
OsI\_025582 SLTQGLEFSKR
