# Supplementary material for: Regulation of membrane trafficking and organ separation by the NEVERSHED ARF-GAP protein
Source: Oxford University Press journal article supplement (doi:10.1242/dev.033605), 2009-05-08
Supplement: dev033605tables1.pdf [file dev033605tables1.pdf]

**Table S1. Markers used in NEV co-localization experiments**

| Gene          | Marker    | AGI locus | Description                         | Localization                           | Reference(s)*                                |
|---------------|-----------|-----------|-------------------------------------|----------------------------------------|----------------------------------------------|
| NIP1;1        | Wave 6y   | At4g19030 | aquaporin                           | Endoplasmic reticulum                  | Geldner et al., 2009                         |
| RabF2a (Rha1) | Wave 7y   | At5g45130 | Rab5 family GTPase                  | Pre-vacuolar compartment/late endosome | Lee et al., 2004; Ueda et al., 2004          |
| VTI12         | Wave 13y  | At1g26670 | v-SNARE                             | Trans-Golgi network/early endosome     | Sanderfoot et al., 2001; Uemura et al., 2004 |
| RabD2a        | Wave 29y  | At1g02130 | Rab GTPase                          | Golgi-associated/endosomal             | Zheng et al., 2005                           |
| RabA1e        | Wave 34y  | At4g18430 | Rab GTPase                          | Endosomal/recycling endosome           | Geldner et al., 2009                         |
| RabA1g        | Wave 129y | At3g15060 | Rab GTPase                          | Endosomal/recycling endosome           | Geldner et al., 2009                         |
| NPSN12        | Wave 131y | At1g48240 | syntaxin                            | Plasma membrane                        | Zheng et al., 2002; Uemura et al., 2004      |
| CGL1 (NAG)    | NAG-EGFP  | At4g38240 | N-acetyl glucosaminyl transferase I | Golgi                                  | Grebe et al., 2003                           |

\*For assessment of localization patterns.

## Reference

**Uemura, T., Ueda, T., Ohniwa, R. L., Nakano, A., Takeyasu, K. and Sato, M. H.** (2004). Systematic analysis of SNARE molecules in *Arabidopsis*: Dissection of the post-Golgi network in plant cells. *Cell Struct. Funct.* **29**, 49-65.
