# Supplementary figures and images for: Regulation of membrane trafficking and organ separation by the NEVERSHED ARF-GAP protein
Source: Oxford University Press journal article supplement (doi:10.1242/dev.033605), 2009-05-08

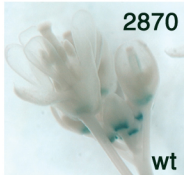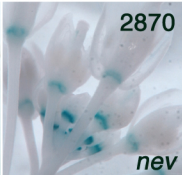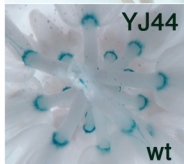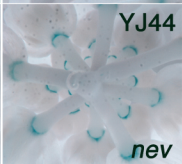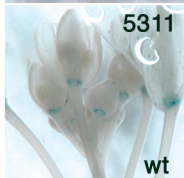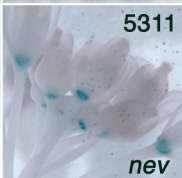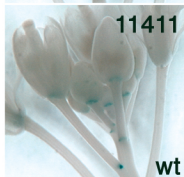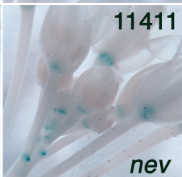

Supplement: dev033605-sup-033605-figs1.pdf [file dev033605-sup-033605-figs1.pdf]

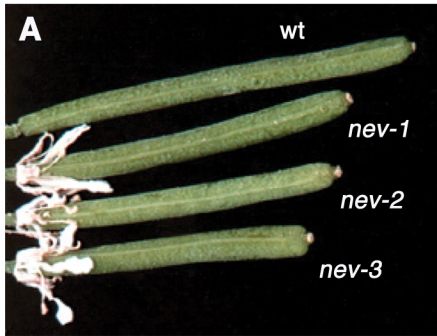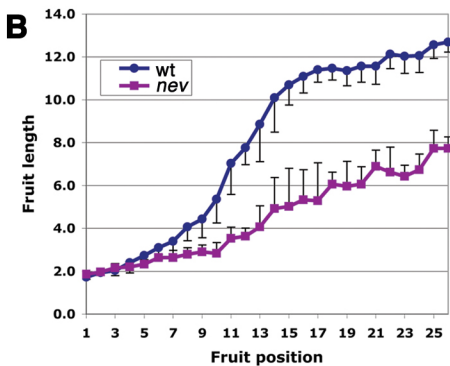

Supplement: dev033605-sup-033605-figs2.pdf [file dev033605-sup-033605-figs2.pdf]

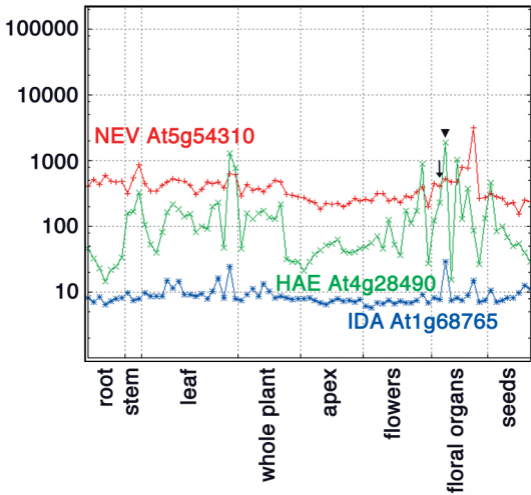

Supplement: dev033605-sup-033605-figs4.pdf [file dev033605-sup-033605-figs4.pdf]

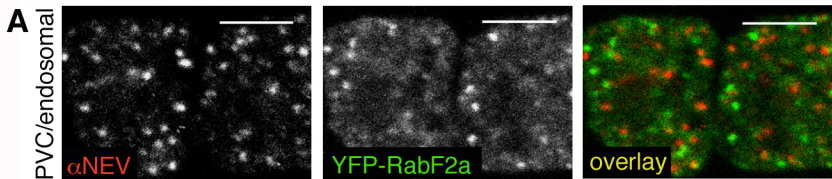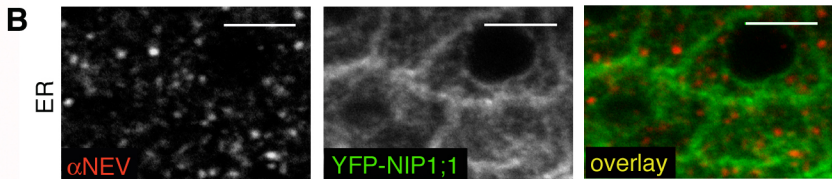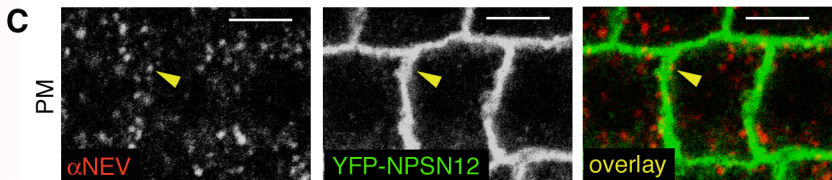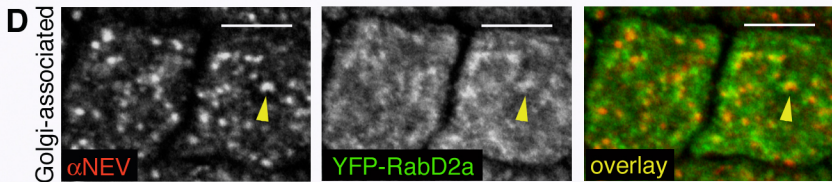

Supplement: dev033605-sup-033605-figs5.pdf [file dev033605-sup-033605-figs5.pdf]

*trans*-Golgi network

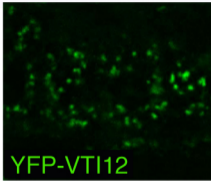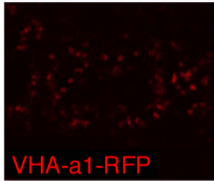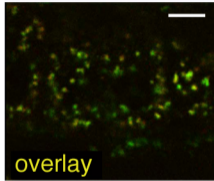

Supplement: dev033605-sup-033605-figs6.pdf [file dev033605-sup-033605-figs6.pdf]

- BFA

+ BFA

Col WT  
 $\alpha$ NEV

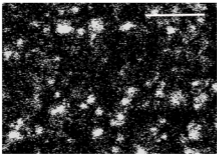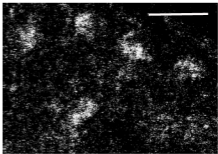

Supplement: dev033605-sup-033605-figs7.pdf [file dev033605-sup-033605-figs7.pdf]

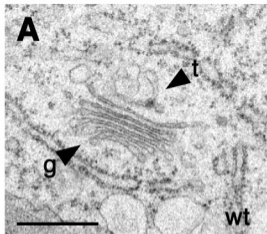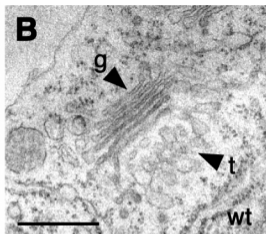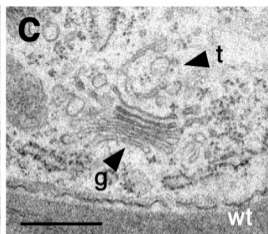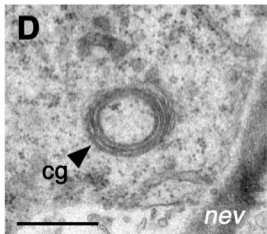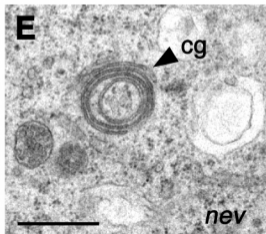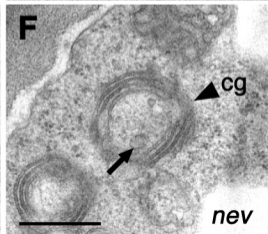

Supplement: dev033605-sup-033605-figs8.pdf [file dev033605-sup-033605-figs8.pdf]

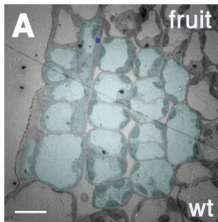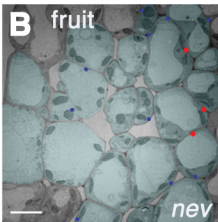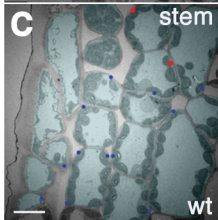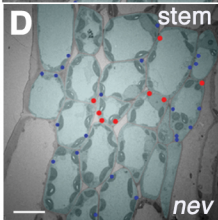

Supplement: dev033605-sup-033605-figs9.pdf [file dev033605-sup-033605-figs9.pdf]
